# Supplementary material
Source: PubMed Central journal article supplement (PMC3277190)
Supplement: 1119394109_pnas.1119394109_SI.pdf [file 1119394109_pnas.1119394109_SI.pdf]

# Supporting Information

Sakata et al. 10.1073/pnas.1119394109

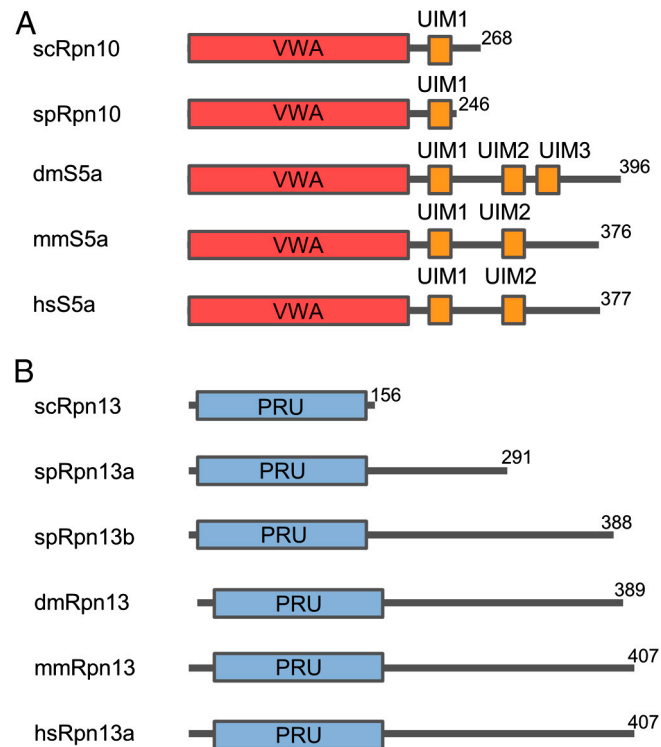

**Fig. S1.** Domain structures of Rpn10 and Rpn13 from various species. (A) Rpn10 consists of the N-terminal von Willebrand factor A domain (red) and C-terminal UIM domain (orange). *Saccharomyces cerevisiae* Rpn10 contains only one ubiquitin-interacting motif (UIM), whereas human and *Drosophila* S5a contain two and three UIMs, respectively. (B) The N-terminal pleckstrin-like receptor of ubiquitin domain of Rpn13 is generally conserved among species, whereas the C-terminal region which interacts with UCH37 is absent in *S. cerevisiae* and *Schizosaccharomyces pombe*.



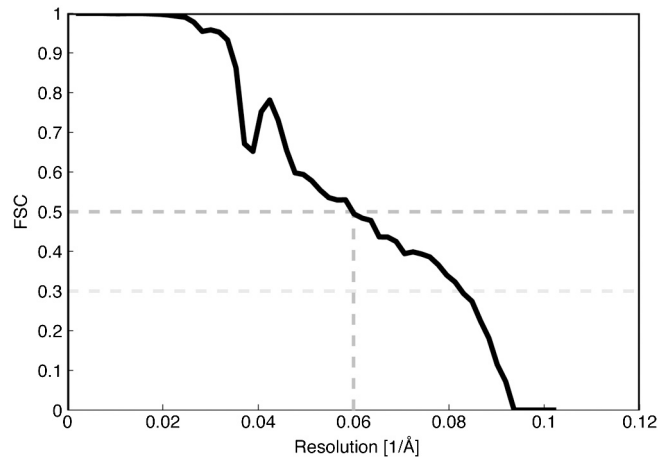

Fig. S3. Fourier shell correlation (FSC) curve of the wild-type 26S proteasome. The resolution of the final reconstruction was estimated to be 16.8 Å using the FSC 0.5 cutoff criterion or 12.1 Å for FSC = 0.3.

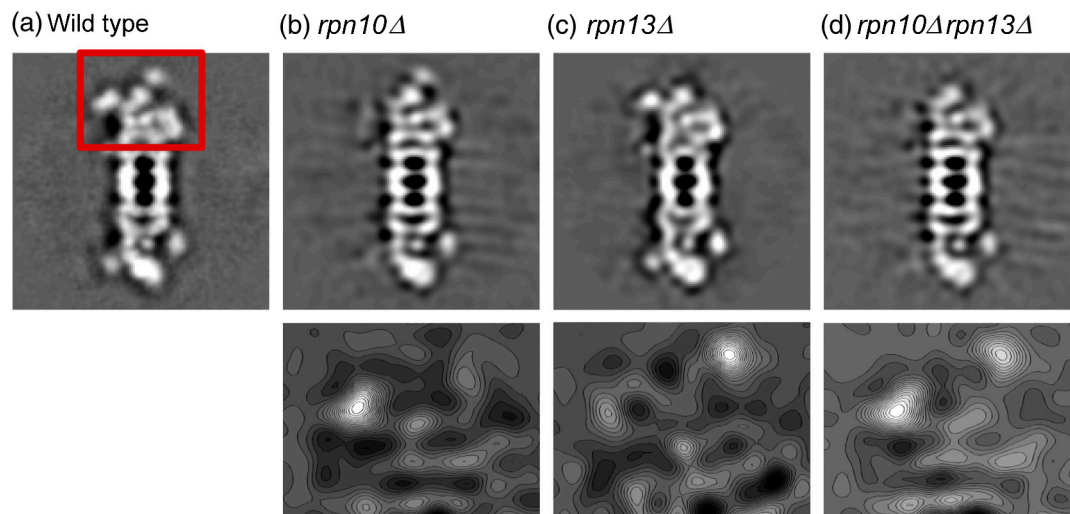

Fig. S4. Structural comparisons between wild-type and deletion mutants. A projection of total averaged structures (upper row) and difference maps (lower row) are represented in the same orientation. 195 regulatory particles (RPs) are marked with a rectangle.
